# Supplementary material
Source: HighWire-hosted journal article supplement (https://www.ez-admanager.com/content/suppl/2018/06/28/WNL.0000000000004740)
Supplement: burman_2462.pdf [file burman_2462.pdf]

# Epilepsia en esclerosis múltiple

## Un estudio nacional de registro poblacional

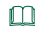

Joachim Burman, MD,  
PhD\*  
Johan Zelano, MD,  
PhD\*

Correspondencia y solicitud de  
separatas al Dr. Zelano:  
johan.zelano@neuro.gu.se

### RESUMEN

**Objetivo:** Determinar la incidencia acumulada de epilepsia en una cohorte poblacional de pacientes con esclerosis múltiple (EM) e investigar la asociación entre la epilepsia y las características clínicas de la EM.

**Métodos:** Se incluyeron todos los pacientes disponibles en el registro sueco de EM (n = 14.545) y 3 controles pareados por sexo y edad para cada paciente, seleccionados aleatoriamente de un registro poblacional (n = 43.635). Los datos sobre las características clínicas de la EM fueron extraídos del registro sueco de EM, y los datos sobre epilepsia y muerte fueron extraídos de los registros completos de los pacientes.

**Resultados:** La incidencia acumulada de epilepsia fue 3,5% (intervalo de confianza [IC] del 95% 3,17 – 3,76) en pacientes con EM y 1,4% (IC 95% 1,30 – 1,52) en controles (riesgo relativo 2,5, IC 95% 2,19 – 2,76). En un modelo proporcional Cox, la EM aumentó el riesgo de epilepsia (razón de riesgo 3,2, IC 95% 2,64 – 3,94). Los pacientes con EM recurrente-remitente tuvieron una incidencia acumulada de epilepsia de 2,2% (IC 95% 1,88 – 2,50), mientras que los pacientes con enfermedad progresiva tuvieron una incidencia acumulada de epilepsia de 5,5% (IC 95% 4,89 – 6,09). La incidencia acumulada crecía continuamente junto con una mayor duración de la enfermedad hasta 5,9% (IC 95% 4,90 – 7,20), en pacientes con enfermedad de  $\geq 34$  años de duración. Los pacientes con un puntaje de  $\geq 7$  en la Escala Expandida del Estado de Discapacidad (EDSS) tuvieron una incidencia acumulada de epilepsia de 5,3% (IC 95% 3,95 – 7,00). La duración de la enfermedad y el puntaje de EDSS estuvieron asociados con epilepsia luego de una regresión logística múltiple (*odds ratio* [OR] 1,03, IC 95% 1,01 – 1,04 por año,  $p = 0,001$ ; y OR 1,2, IC 95% 1,09 – 1,26 por escalón en el EDSS,  $p < 0,0001$ ).

**Conclusiones:** La epilepsia es más común en pacientes con EM que en la población general, y un diagnóstico de EM aumenta el riesgo de epilepsia. Nuestros datos sugieren una relación directa entre la severidad de la EM y la epilepsia. *Neurology*® 2017;89:2462-2468

### GLOSARIO

**EDSS** = Expanded Disability Status Scale (Escala Expandida del Estado de Discapacidad); **EM** = Esclerosis Múltiple; **EMRR** = Esclerosis Múltiple Recurrente Remitente; **EMSP** = Esclerosis Múltiple Secundariamente Progresiva; **HR** = hazard ratio (razón de riesgo); **IC** = intervalo de confianza; **ICD** = International Classification of Diseases (Clasificación Internacional de Enfermedades); **OR** = odds ratio; **regSEM** = registro sueco de EM; **RNP** = Registro Nacional de Pacientes; **RR** = riesgo relativo.

La estrecha relación entre la esclerosis múltiple (EM) y la epilepsia ya fue sugerida en el siglo XIX,<sup>1</sup> y varios investigadores han evaluado la asociación epidemiológica entre estas condiciones.<sup>2</sup> La prevalencia de epilepsia en la EM ha sido recientemente estimada en 3,1%, en comparación con el 0,6% de la población general.<sup>3,4</sup> Actualmente no se sabe por qué los pacientes con EM tienen un riesgo aumentado de desarrollar epilepsia.

Aunque la EM es frecuentemente conceptualizada como una enfermedad de la sustancia blanca, ahora hay amplia aceptación de que las lesiones de la EM también están presentes en la sustancia gris,<sup>5</sup> ofreciendo un prerrequisito para la epilepsia. Las lesiones de la sustancia gris son cada vez más frecuentes con el tiempo y omnipresentes en la mayoría de los pacientes con EM secundariamente progresiva (EMSP). También están estrechamente relacionadas con la discapacidad.<sup>6</sup> Si el riesgo de epilepsia está asociado a la carga de lesiones corticales, se debería esperar una prevalencia aumentada de epilepsia entre los pacientes con EM con enfermedad avanzada, pero esto ha sido difícil de demostrar hasta ahora.<sup>7</sup>

El objetivo de este estudio fue probar la hipótesis de que un aumento en la duración, la discapacidad y la progresión de la enfermedad infieren en un riesgo aumentado de epilepsia en pacientes con EM. Con este fin, cruzamos datos de un registro nacional am-

\*Estos autores contribuyeron de igual forma al trabajo.

Del Department of Neuroscience (J.B.), Uppsala University; y el Department of Clinical Neuroscience (J.Z.), Sahlgrenska Academy, University of Gothenburg y Sahlgrenska University Hospital, Suecia.

Ir a [Neurology.org](http://Neurology.org) para declaraciones de intereses completas. La información sobre fondos y aquellas declaraciones relevantes para los autores, si existiesen, se encuentran al final del artículo.

plio de EM que contiene datos de > 15.000 pacientes con EM, con datos del exhaustivo registro nacional de pacientes (RNP).

### **MÉTODOS** Diseño del estudio y cohorte del estudio.

Este fue un estudio retrospectivo basado en registros. La cohorte consistió de pacientes con EM (casos) y controles pareados por edad y sexo en el momento de ingresar a la cohorte. Para cada individuo presente en el registro sueco de EM (regSEM) el 1 de diciembre de 2015 (n = 15.810), se crearon 3 controles aleatorios pareados según sexo y edad, del registro poblacional por fecha de entrada del caso en la cohorte (definida como inicio de los síntomas o, si no había, diagnóstico de EM). Los casos para los cuales no pudo generarse un control (n = 1265) debido a errores de registro (n = 15), falta de información sobre el inicio de la enfermedad (n = 782) o ausencia en el registro poblacional al momento del inicio de la enfermedad (n = 468) fueron excluidos. La cohorte final del estudio consistió de 14.545 casos y 43.635 controles.

**Registros, datos clínicos y definiciones.** Los datos sobre la incidencia y características clínicas de la EM fueron recolectados del regSEM, que al momento de la exportación de datos tenía una cobertura estimada del 82% ([www.neuroreg.se](http://www.neuroreg.se)). Estos datos fueron registrados prospectivamente por los médicos tratantes. Los datos sobre diagnósticos relacionados con epilepsia fueron recolectados del RNP, que es manejado por la Comisión Nacional de Salud y Bienestar y contiene todos los diagnósticos de pacientes internados desde 1987, algunos pacientes ambulatorios desde 2001, y la mayoría de los pacientes ambulatorios desde 2005 al 31 de diciembre de 2014. Para los cuidadores de la salud suecos es obligatorio hacer reportes al RNP. La epilepsia fue definida como código 345 del ICD-9 excepto Q o código G40 del ICD-10. Una crisis fue definida como código 780D del ICD-9 o código R56.8 del ICD-10. Status epiléptico fue definido como código 345Q del ICD-9 o código G41 del ICD-10. La incidencia acumulada se refiere a la proporción de pacientes con un diagnóstico registrado alguna vez en el RNP. Para estimar la prevalencia, utilizamos la definición de Annegers<sup>8</sup> y Hauser et al.,<sup>9</sup> por ej., pacientes admitidos o vistos como pacientes ambulatorios con un diagnóstico de epilepsia durante los últimos 5 años antes del 31 de diciembre de 2014. La fecha de muerte fue sacada del registro nacional de salud, en el cual también es obligatorio hacer reportes. Todos los datos fueron cruzados y mantenidos anónimos por la Comisión Nacional de Salud y Bienestar.

**Aprobaciones estándar de protocolo, registros y consentimiento de pacientes.** El estudio fue aprobado por el comité de ética regional de Gothenburg (No. 186-15).

**Análisis estadístico.** Para el análisis descriptivo, utilizamos los últimos valores registrados para la Escala Expandida de Estado de Discapacidad (EDSS) y estado de enfermedad, ya que los valores de EDSS fueron ingresados durante los 2 años previos a la salida. Para variables continuas, se reportan la media y el DE. El puntaje de EDSS se reporta como mediana y rango. Los riesgos relativos (RR) son razones

de incidencias acumuladas con intervalos de confianza del 95% (IC 95%) calculados con el método de puntaje asintótico de Koopman. Para variables categóricas, se utilizó el test exacto de Fisher para comparar proporciones, y se utilizó el test de Cochran-Armitage para los datos ordenados de forma escalonada ascendente. Los *odds ratio* (OR) fueron calculados con regresión logística para investigar la asociación entre variables explicativas y epilepsia en los datos de salida. Se utilizaron análisis Cox, con adición escalonada de variables explanatorias y subsecuentes ajustes multivariable, para investigar la contribución de estas variables al riesgo de desarrollar epilepsia luego de la entrada a la cohorte. En estos análisis y otros análisis en los cuales el inicio de la epilepsia fue evaluado en relación con el inicio de la EM, excluimos solo pacientes con inicio de EM 5 años después del inicio del registro de diagnósticos en el RNP (31 de diciembre de 1991) para permitir 5 años de detección de epilepsia preexistente de acuerdo con la definición superior de casos de epilepsia prevalente. Para el análisis Cox en el cual el estado de enfermedad fue investigado como covariable, el análisis empezó al inicio de la EM, y el punto en el tiempo de conversión de EM remitente recurrente (EMRR) a EMSP fue utilizado para segmentar en el tiempo esta covariable.

Todas las proporciones, RR, y razones de riesgo HR, (HR, *hazard ratio*) se establecen con 2 figuras significativas, mientras que los OR e IC 95% son establecidas con 3 figuras significativas. Las frecuencias y modelos de regresión fueron computados en SPSS versión 23 (SPSS Inc, Chicago, IL). Los IC, RR y comparaciones de proporciones fueron calculados en Graph-Pad Prism versión 7 (GraphPad Software, La Jolla, CA). Los datos faltantes fueron considerados ausentes y no se realizó ninguna imputación. Todos los tests estadísticos fueron de 2 lados con  $\alpha = 0,05$ .

### **RESULTADOS** Características demográficas.

Las características demográficas y de enfermedad de la cohorte están resumidas en la tabla 1.

#### **Incidencia acumulada, prevalencia y riesgo de epilepsia. Incidencia acumulada de epilepsia.**

La incidencia acumulada de epilepsia, crisis únicas y status epiléptico fue mayor en pacientes con EM que en controles. Se realizó el diagnóstico de epilepsia en 502 pacientes con EM (3,5%, IC 95% 3,17 – 3,76) y en 613 controles (1,4%, IC 95% 1,30 – 1,52,  $p < 0,0001$ ), lo que corresponde a un RR de 2,5 (IC 95% 2,19 – 2,76). Se realizó el diagnóstico de crisis única en el 3,0% (IC 95% 2,77 – 3,32) de pacientes con EM y en el 1,2% (IC 95% 1,12 – 1,33) de controles ( $p < 0,0001$ ), para un RR de 2,5 (IC 95% 2,20 – 2,82). Se realizó el diagnóstico de status epiléptico en el 0,48% (IC 95% 0,381 – 0,608) de pacientes con EM y en el 0,066% (IC 95% 0,0463 – 0,0954) de controles ( $p < 0,0001$ ), para un RR de 7,2 (IC 95% 4,72 – 11,1). Para pacientes con EMRR y puntaje de EDSS de 0 (n = 1093), la incidencia acumulada de epilepsia fue 1,4% (IC 95% 0,833 – 2,25). Considerando solo individuos que estaban vivos al finalizar (13.713 casos y 41.683 controles), la

**Tabla 1** Datos demográficos y características clínicas de los pacientes con EM

|                                                     | n      | Años, media (DE) | %              |
|-----------------------------------------------------|--------|------------------|----------------|
| <b>Sexo</b>                                         |        |                  |                |
| Mujeres                                             | 10.262 |                  | 71             |
| Hombres                                             | 4283   |                  | 29             |
| <b>Edad</b>                                         |        |                  |                |
| Edad al inicio de la EM                             | 14.524 | 34 (11)          |                |
| Edad al final del seguimiento <sup>a</sup>          | 14.545 | 51 (14)          |                |
| Duración de la enfermedad                           | 14.167 | 17 (12)          |                |
|                                                     | n      | Años, media (DE) | % del subgrupo |
| <b>Curso de la EM, edad y proporciones</b>          |        |                  |                |
| Todos con el curso declarado                        | 13.922 | 51 (14)          |                |
| Primariamente progresiva                            | 1244   | 63 (11)          | 8,9            |
| Progresiva recurrente                               | 193    | 51 (14)          | 1,4            |
| Recurrente remitente                                | 8408   | 45 (12)          | 60             |
| Secundariamente progresiva                          | 4077   | 60 (11)          | 29             |
| <b>Tratamiento</b>                                  |        |                  |                |
| Todos con datos sobre tratamiento                   | 12.555 |                  |                |
| Sin tratamiento                                     | 1763   |                  | 14             |
| Cualquier tratamiento                               | 10.792 |                  | 86             |
| Cualquier tratamiento de primera línea <sup>b</sup> | 9488   |                  | 76             |
| Cualquier tratamiento de segunda línea <sup>c</sup> | 4552   |                  | 36             |
| Azatioprina, mitoxantrona                           | 520    |                  | 4,1            |
| TCMH                                                | 90     |                  | 0,7            |
|                                                     | n      | Mediana          | IQR            |
| <b>Puntaje EDSS</b>                                 |        |                  |                |
| En el último examen físico                          | 8.395  | 3                | 01-may         |

Abreviaturas: EDSS = Escala de Estado de Discapacidad Expandida; EM = esclerosis múltiple; TCMH = trasplante de células madre hematopoyéticas.

<sup>a</sup>Salida o muerte.

<sup>b</sup>Interferón, acetato de glatiramer, teriflunomida o dimetil fumarato.

<sup>c</sup>Alentuzumab, fingolimod, natalizumab o rituximab.

incidencia acumulada de epilepsia fue 2,9% (IC 95% 2,60 – 3,16) en pacientes con EM y 1,2% (IC 95% 1,08 – 1,29) en controles ( $p < 0,0001$ ), con un RR de 2,4 (IC 95% 2,13 – 2,77).

**Prevalencia actual de epilepsia.** Determinamos la prevalencia actual de epilepsia en 5 años, una definición frecuentemente utilizada de casos prevalentes de epilepsia.<sup>8</sup> La prevalencia en 5 años al finalizar fue 1,7% (IC 95% 1,54 – 1,98) en pacientes con EM y 0,71% (IC 95% 0,629 – 0,790) en controles (RR de 2,5, IC 95% 2,09 – 2,93,  $p < 0,0001$ ).

**Riesgo de epilepsia.** El HR para incidencia de epilepsia luego de la entrada a la cohorte fue evaluada con un modelo Cox. Las variables explicativas fueron el diagnóstico de EM, el sexo y la edad al momento de la entrada en la cohorte (dependiente del tiempo). En este modelo, basado en 40.082 individuos con entrada en la cohorte después de 1991, solo el diagnóstico de EM y el sexo fueron significativos; el HR para epilepsia en EM fue 3,2 (IC 95% 2,64 – 3,94).

**Factores asociados con la epilepsia. Sexo.** La incidencia acumulada de epilepsia fue de algu-

na manera mayor en hombres que en mujeres en el grupo control (1,6% vs 1,3%,  $p = 0,026$ ) (RR 1,2, IC 95% 1,03 – 1,43). No hubo una diferencia estadísticamente significativa en la incidencia acumulada de epilepsia en hombres y en mujeres con EM, con tasas de 3,6% vs 3,4% ( $p = 0,43$ ). Sin embargo, la razón hombre a mujer de individuos con epilepsia fue muy similar entre ambos grupos (hombre/mujer control 33%, hombre/mujer con EM 31%,  $p = 0,40$ ).

**Edad.** Analizamos la incidencia acumulada de epilepsia en 9 estratos de edad (figura 1A). Para controles, la incidencia acumulada varió entre 1,2% y 1,7%, y no hubo una tendencia significativa de aumento de la incidencia acumulada por una mayor edad ( $p = 0,23$ ). En pacientes con EM, la incidencia acumulada aumentó con la edad de 2,7% a 4,7% ( $p = 0,0001$ , test  $\chi^2$  para tendencia).

**Inicio de la EM en relación con el diagnóstico de primera crisis.** La primera manifestación de crisis o epilepsia fue investigada en relación con el inicio de EM para individuos con entrada en la cohorte > 5 años después del inicio del RNP en 1987 (tabla 2). Todos los diagnósticos asociados a

**Figura 1** Incidencia acumulada de epilepsia en pacientes con EM

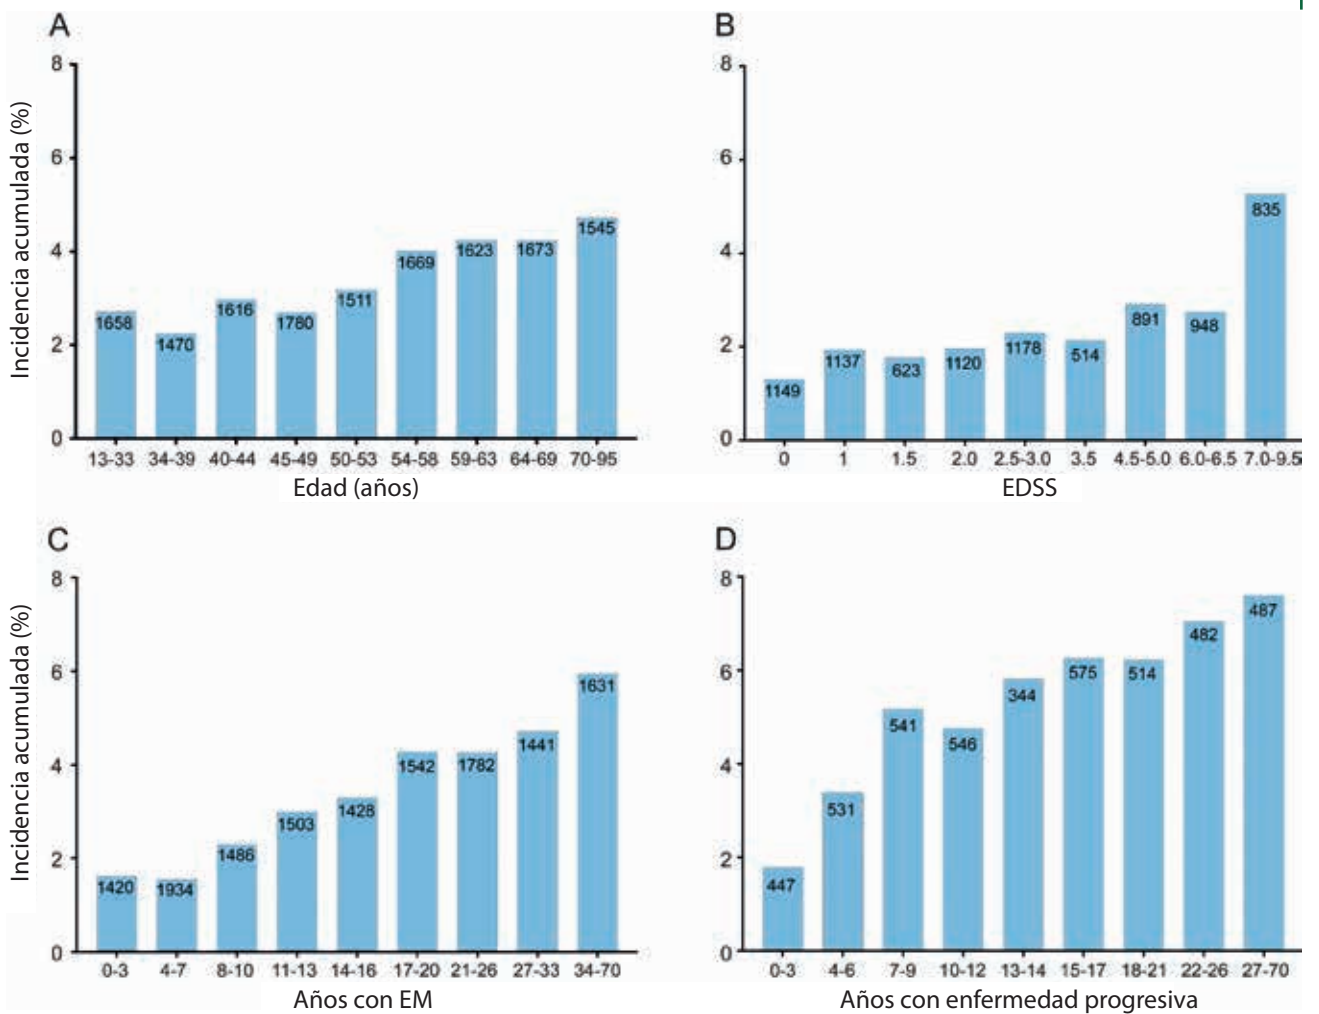

Incidencia acumulada de epilepsia en 9 estratos distribuidos equitativamente de (A) edad, (B) puntaje de EDSS, (C) duración de EM y (D) duración de enfermedad progresiva. El número de individuos en cada estrato está indicado por número negro en las barras. EDSS = Escala Expandida de Estado de Discapacidad; EM = esclerosis múltiple.

crisis fueron incluidos en el análisis. En controles, una proporción significativamente mayor de crisis, epilepsia o status epiléptico, ocurrió antes de la entrada en la cohorte, en comparación con los pacientes con EM. La incidencia acumulada de cualquiera de estos diagnósticos relacionados con una crisis antes de la entrada en la cohorte no fue significativamente diferente entre casos y controles (1,4%, IC 95% 1,18 – 1,63 vs 1,2%, IC 95% 1,06 – 1,29,  $p = 0,08$ , test exacto de Fisher).

**Enfermedad progresiva.** Luego evaluamos la distribución de la epilepsia entre los individuos

con diferentes cursos de enfermedad (tabla 3). Se encontró un diagnóstico de epilepsia en una proporción significativamente menor de pacientes con EMRR que en pacientes con enfermedad progresiva (RR 2,5, IC 95% 2,11 – 3,02).

También evaluamos la contribución de la enfermedad progresiva en un modelo Cox basado en 9090 individuos con EM y entrada en la cohorte después de 1991. Las variables fueron edad al inicio de la EM, sexo y enfermedad progresiva (segmentadas por tiempo). La enfermedad progresiva aumentó el riesgo de epilepsia por

**Tabla 2** Momento de la primera crisis o diagnóstico de epilepsia en relación con el inicio de la EM

| Momento de la primera crisis/epilepsia       | EM (n = 442) |                | Controles (n = 650) |                | Valor p  |
|----------------------------------------------|--------------|----------------|---------------------|----------------|----------|
|                                              | n            | % (IC 95%)     | n                   | % (IC 95%)     |          |
| Antes/al momento de la entrada en la cohorte | 146          | 33 (28,8-37,5) | 369                 | 57 (52,9-60,5) | < 0,0001 |
| < 10 años de la entrada en la cohorte        | 204          | 46 (41,3-50,6) | 198                 | 30 (27,0-34,1) | < 0,0001 |
| > 10 años de la entrada en la cohorte        | 92           | 21 (17,3-24,8) | 83                  | 13 (10,4-15,6) | 0,0005   |

Abreviaturas: EM = esclerosis múltiple; IC = intervalo de confianza.

Basado en 10.522 pacientes y 31.566 controles con entrada en la cohorte después de 1991. Se utilizó el test exacto de Fisher para determinar el significado estadístico entre pacientes con EM y controles.

**Tabla 3** Incidencia acumulada de epilepsia en pacientes con un curso de enfermedad estratificado al final

|                                      | n      | Incidencia acumulada |                 | Valor p  |
|--------------------------------------|--------|----------------------|-----------------|----------|
|                                      |        | n (Ep)               | % (IC 95%)      |          |
| <b>Casos con curso de enfermedad</b> | 13.922 | 483                  | 3,5 (3,18-3,78) |          |
| <b>EMRR</b>                          | 8408   | 182                  | 2,2 (1,88-2,50) | ref      |
| <b>EM progresiva</b>                 | 5514   | 301                  | 5,5 (4,89-6,09) | < 0,0001 |
| <b>EMSP</b>                          | 4077   | 232                  | 5,7 (5,02-6,44) | < 0,0001 |
| <b>EMPR</b>                          | 193    | 8                    | 4,1 (2,12-7,97) | NS       |
| <b>EMPP</b>                          | 1244   | 61                   | 4,9 (3,84-6,25) | < 0,0001 |

Abreviaturas: EM = esclerosis múltiple; EMPP = EM primariamente progresiva; EMPR = EM progresiva recurrente; EMRR = EM recurrente remitente; EMSP = EM secundariamente progresiva; Ep = epilepsia; IC = intervalo de confianza; NS = no significativo ( $p > 0,05$ ).

El test exacto de Fisher fue utilizado para determinar el significado estadístico entre pacientes con EMRR y pacientes con subtipos de enfermedad progresiva.

un HR de 2,5 (IC 95% 1,75 – 3,62). El resultado fue similar si los casos de EM primariamente recurrente o EMPP eran excluidos, dejando 8130 individuos con EMRR o EMSP. La progresión a EMSP aumentó el riesgo de epilepsia con un HR de 3,3 (IC 95% 2,06 – 5,23).

#### **Duración de la enfermedad y discapacidad.**

La incidencia acumulada de epilepsia fue entonces evaluada en pacientes con EM de duración conocida ( $n = 14.167$ , incidencia acumulada de epilepsia 5,4%), y puntaje de EDSS conocido ( $n = 8395$ , incidencia acumulada de epilepsia 2,4%). Para cada variable, los pacientes fueron divididos en 9 estratos de edad. La incidencia acumulada de epilepsia aumentó (test  $\chi^2$  para tendencia,  $p < 0,0001$ ) con la duración de la enfermedad, duración de la enfermedad progresiva y puntaje de EDSS (figura 1, B-D). La asociación entre la epilepsia y la duración de la enfermedad y discapacidad también fue evaluada por regresión logística. Los pacientes con EM con diagnóstico de epilepsia previo al inicio de la EM fueron excluidos. El análisis univariado demostró asociaciones significativas para todas las variables: OR de 1,04 (IC 95% 1,03 – 1,05) por año de duración de enfermedad, OR de 1,04 (IC 95% 1,02 – 1,05) por año de enfermedad progresiva ( $n = 4437$ ) y OR de 1,24 (IC 95% 1,16 – 1,31) por escalón en el EDSS ( $n = 8084$ ). En el análisis de regresión logística múltiple con puntaje EDSS, duración de la enfermedad y sexo considerados como variables independientes ( $n = 7931$ ), el puntaje de EDSS tuvo un OR de 1,17 (IC 95% 1,09 – 1,26,  $p < 0,0001$ ) por escalón del EDSS y la duración de la enfermedad tuvo un OR de 1,03 (IC 95% 1,01 – 1,04,  $p = 0,001$ ) por año. De forma similar, con el puntaje de EDSS, la duración de la enfermedad progresiva y el sexo considerados como variables independientes ( $n = 2171$ ), el OR para el puntaje EDSS fue 1,27 (IC 95% 1,09 – 1,49,  $p = 0,003$ ), y el OR para duración de enfermedad progresiva fue 1,03 (IC 95% 1,00 – 1,06,  $p = 0,045$ ).

**DISCUSIÓN** En el estudio más grande sobre la relación entre las características de enfermedad

de EM y epilepsia hasta ahora, confirmamos que un diagnóstico de EM lleva a un aumento en el riesgo de desarrollar una epilepsia subsecuente, y que la epilepsia es más común entre pacientes con EM que en sus controles pareados. Podríamos confirmar nuestra hipótesis de que la epilepsia en la EM está relacionada con el puntaje de EDSS, la duración de la enfermedad y la enfermedad progresiva, sugiriendo que hay un nexo directo entre la severidad de la EM y la epilepsia. Las tasas de epilepsia en pacientes y controles son coherentes con las observaciones previas. La prevalencia de epilepsia es difícil de comparar entre estudios debido a que las variaciones pueden reflejar verdaderas diferencias y también diferencias en la metodología, pero hasta cierto punto, las similitudes con los hallazgos de otros investigadores validan nuestra metodología. La prevalencia en 5 años, la medida epidemiológica más comúnmente utilizada,<sup>8</sup> en nuestro grupo control fue similar a una estimada recientemente de Dinamarca y de un meta-análisis global de epilepsia.<sup>4,10</sup> La incidencia acumulada de epilepsia de 3,5% en pacientes con EM en este estudio es similar al estimado de 3,09% (IC 95% 2,01 – 4,16) en una revisión sistemática reciente basada en 11 estudios basados en poblaciones.<sup>3</sup> En un estudio canadiense reciente basado en la población, con un diseño similar al nuestro, el RR de epilepsia fue 2,18 (IC 95% 1,95 – 2,83), similar al RR de 2,5 encontrado en este estudio.<sup>11</sup> Para análisis subsecuentes, nosotros utilizamos la incidencia acumulada, recomendada para estudios etiológicos por la Liga Internacional Contra la Epilepsia.<sup>12</sup> Nuestro método subestima ligeramente la incidencia acumulada de la epilepsia porque el registro de pacientes se inició en 1987 y no capturó a las epilepsias que se resolvieron o que ocurrieron en individuos > 30 años de edad al final y presumiblemente controles más que casos. El grupo control es un buen comparador para los casos de EM, pero la distribución de la edad de nuestro material no lo hace ideal para comparaciones de la incidencia acumulada de epilepsia en la población general de Suecia.

La epilepsia es común y bien reconocida luego de injurias al cerebro como la lesión traumática, las hemorragias intracraneales y el infarto cerebral isquémico. De forma similar a estas entidades, la EM es un proceso que daña el tejido cerebral interrumpiendo circuitos neuronales y dañando la corteza cerebral. Parece muy razonable que la incidencia acumulada de epilepsia debería aumentar con una EM más avanzada, pero esto ha sido difícil de probar en estudios previos.<sup>13,14</sup> En este estudio, hubo una fuerte correlación entre la epilepsia y la discapacidad, alcanzando una incidencia acumulada de 5,3% en pacientes con EM con un puntaje EDSS  $\geq 7$ . Con el uso de una metodología similar, la incidencia acumulada de epilepsia post-apoplejía en Suecia fue estimada en 7,3%.<sup>15</sup>

De forma similar, pudimos demostrar una clara asociación entre la epilepsia y un curso progresivo de enfermedad (figura 2), reflejando presuntamente la alta probabilidad de lesiones de sustancia gris en este subgrupo de pacientes.<sup>16</sup> La incidencia acumulada de epilepsia en pacientes con EMRR sin discapacidad fue similar a la de los controles, reforzando más aún esta conexión. La duración de la enfermedad estuvo independientemente asociada con una probabilidad aumentada de epilepsia en un modelo de regresión multivariada con el puntaje de EDSS. Esto aumenta la posibilidad de que haya otros mecanismos adicionales a la carga de lesiones corticales, por ej., neuroinflamación prolongada, en línea con la cantidad de evidencia emergente, que apoya el rol de la inflamación en la epileptogénesis.<sup>17</sup> Una posible advertencia a esta interpretación es que nuestros hallazgos sobre la duración de la enfermedad pueden haber sido confundidos debido al tratamiento con drogas modificadoras de enfermedad en pacientes con un diagnóstico más reciente de EM.

Este estudio fue diseñado como un estudio sobre la base de registros, con todas las fortalezas y debilidades inherentes.<sup>18</sup> Una fortaleza notable es que el reporte al RNP es obligatorio para el cuidado hospitalario en Suecia, con una cobertura de  $> 99\%$ .<sup>19</sup> La neurología en Suecia es eminentemente hospitalaria, y los pacientes con crisis son usualmente vistos en internación o en clínicas ambulatorias en algún momento. La prevalencia en la población del estudio fue al nivel esperado, indicando que la metodología permite una detección adecuada de la epilepsia. Sin embargo, no podemos ignorar que algunos pacientes con epilepsia estable pueden haber sido vistos en atención primaria solamente, que llevaría a una ligera subestimación de la prevalencia de la epilepsia. Otra limitación es que nos basamos en los códigos ICD para la identificación de la epilepsia en el RNP. La validez del diagnóstico de epilepsia por ICD no ha sido formalmente establecida, pero una investigación reciente de casos potenciales de muerte súbita inesperada en epilepsia, aunque limitada al ICD-10, demostró  $> 90\%$  de precisión.<sup>20</sup> El regSEM tiene una cobertura de  $> 80\%$ , y en contraste con el RNP, este registro está basado en el aporte voluntario de datos de los neurólogos. Contiene muchos más datos que el RNP, pero también es menos completo. Las tasas de aporte de datos son mayores en áreas urbanas y para pacientes en tratamiento con fármacos modificadores de enfermedad. Por otro lado, los pacientes con enfermedad muy avanzada (por ej., que están en centros de cuidado terciario) pueden no ser vistos por un neurólogo y, por lo tanto, no estar presentes o actualizados temporalmente en el registro. Debido a que la incidencia acumulada de epilepsia fue mayor en pacientes con enfermedad avanzada, esto puede haber llevado a una ligera subestimación del RR global de la epilepsia.

El ingreso de datos en el regSEM ha sido apoyado ampliamente en años recientes como resultado de los desarrollos terapéuticos en el área, y es probable que la calidad de los datos para pacientes que fueron agregados recientemente sea mayor, lo que explica por qué la incidencia acumulada de epilepsia en pacientes con valores de EDSS fue, en parte, menor que en la cohorte global. La calidad de los datos también se reduce si la complejidad de las variables aumenta. La clasificación de los casos (por ej., diagnóstico de EM) es probablemente más robusta, seguida por la duración de la enfermedad, el curso de la enfermedad y el puntaje de EDSS. Las limitaciones del registro deberían resultar principalmente en valores faltantes y reducir la sensibilidad de nuestro análisis más que desviar los resultados sistemáticamente. Nuestros resultados deberían ser replicados en una base de datos independiente, que es posible en países con registros de pa-

**Figura 2** Curso de enfermedad en pacientes con EM con epilepsia

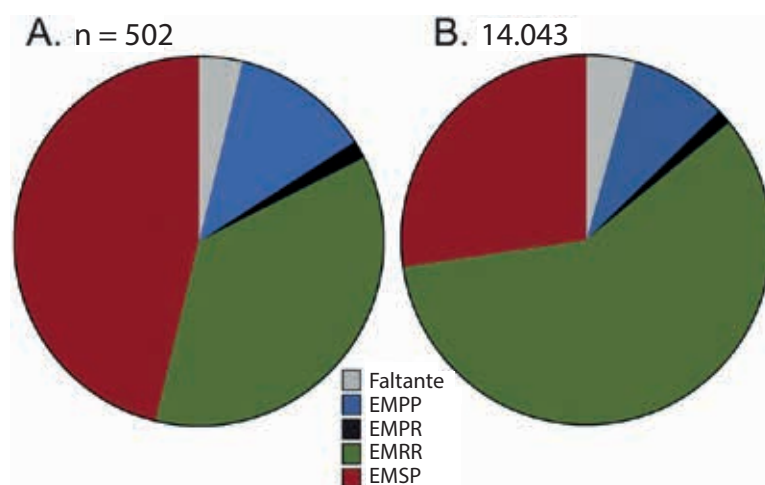

La figura muestra las proporciones de los diferentes cursos de enfermedad en pacientes con EM (A) con epilepsia y (B) sin epilepsia. EM = esclerosis múltiple.

cientes nacionales similares o mediante el uso de datos de la administración de la salud.

Nuestros hallazgos traen una pregunta importante: ¿puede la epilepsia en la EM ser prevenida mediante una terapia modificadora de enfermedad efectiva? Los pacientes con EMRR y sin discapacidad tienen una incidencia acumulada de epilepsia similar a la de los controles, lo que sugiere que esto es posible. Muchas otras preguntas quedan sin resolver. ¿Son las crisis un factor de riesgo para el desarrollo de una enfermedad progresiva? ¿Hay algunos fármacos modificadores de enfermedad mejores para prevenir el desarrollo de epilepsia? ¿Qué fármacos antiepilépticos son mejores para usar en pacientes con EM? Estas y otras preguntas similares deberían dar origen a otro estudio.

### CONTRIBUCIONES DE LOS AUTORES

Joachim Burman: diseño del estudio, análisis de datos, manuscrito. Johan Zelano: diseño del estudio, análisis estadístico, análisis de datos, manuscrito.

### RECONOCIMIENTOS

Los autores agradecen a todos los neurólogos que contribuyeron con datos al regSEM. Los autores agradecen a Mattias Molin, Statistiska konsultgruppen, Gothenburg, por el manejo de datos y el análisis estadístico.

### FONDOS PARA EL ESTUDIO

Este estudio fue apoyado por la Sociedad Sueca de Medicina.

### DECLARACIÓN DE INTERESES

Los autores no tienen nada para declarar relevante al manuscrito. Ir a [Neurology.org](http://Neurology.org) para declaraciones completas.

*Recibido el 19 de abril de 2017. Aceptado en su formato final el 20 de septiembre de 2017.*

### BIBLIOGRAFÍA

1. Ross J. Treatise on the Diseases of the Nervous System. New York: William Wood & Co; 1881.
2. Koch M, Uyttenboogaart M, Polman S, De Keyser J. Seizures in multiple sclerosis. *Epilepsia* 2008;49:948–953.
3. Marrie RA, Reider N, Cohen J, et al. A systematic review of the incidence and prevalence of sleep disorders and seizure disorders in multiple sclerosis. *Mult Scler* 2015; 21:342–349.

4. Fiest KM, Sauro KM, Wiebe S, et al. Prevalence and incidence of epilepsy: a systematic review and meta-analysis of international studies. *Neurology* 2017;88:296–303.
5. Charcot J. Lectures on the Diseases of the Nervous System. London: New Sydenham Society; 1881.
6. van Munster CE, Jonkman LE, Weinstein HC, Uitdehaag BM, Geurts JJ. Gray matter damage in multiple sclerosis: impact on clinical symptoms. *Neuroscience* 2015;303: 446–461.
7. Gasparini S, Ferlazzo E, Ascoli M, et al. Risk factors for unprovoked epileptic seizures in multiple sclerosis: a systematic review and meta-analysis. *Neurol Sci* 2017;38: 399–406.
8. Annegers JF. Epilepsy: Neuroepidemiology From Principles to Practice. New York: Oxford University Press; 2004:303–318.
9. Hauser WA, Annegers JF, Kurland LT. Prevalence of epilepsy in Rochester, Minnesota: 1940–1980. *Epilepsia* 1991;32:429–445.
10. Christensen J, Vestergaard M, Pedersen MG, Pedersen CB, Olsen J, Sidenius P. Incidence and prevalence of epilepsy in Denmark. *Epilepsy Res* 2007;76:60–65.
11. Marrie RA, Patten SB, Tremlett H, et al. Sex differences in comorbidity at diagnosis of multiple sclerosis: a population-based study. *Neurology Epub* 2016 9 Mar.
12. Thurman DJ, Beghi E, Begley CE, et al. Standards for epidemiologic studies and surveillance of epilepsy. *Epilepsia* 2011;52(suppl 7):2–26.
13. Spatt J, Chaix R, Mamoli B. Epileptic and non-epileptic seizures in multiple sclerosis. *J Neurol* 2001;248:2–9.
14. Catenoix H, Marignier R, Ritleng C, et al. Multiple sclerosis and epileptic seizures. *Mult Scler* 2011;17:96–102.
15. Zelano J, Redfors P, Åsberg S, Kumlien E. Association between poststroke epilepsy and death: a nationwide cohort study. *Eur Stroke J* 2016;1:272–278.
16. Kutzelnigg A, Lucchinetti CF, Stadelmann C, et al. Cortical demyelination and diffuse white matter injury in multiple sclerosis. *Brain* 2005;128:2705–2712.
17. Vezzani A, Aronica E, Mazarati A, Pittman QJ. Epilepsy and brain inflammation. *Exp Neurol* 2013;244:11–21.
18. Thygesen LC, Ersboll AK. When the entire population is the sample: strengths and limitations in register-based epidemiology. *Eur J Epidemiol* 2014;29:551–558.
19. Ludvigsson JF, Andersson E, Ekbom A, et al. External review and validation of the Swedish national inpatient register. *BMC Public Health* 2011;11:450.
20. Sveinsson O, Andersson T, Carlsson S, Tomson T. The incidence of SUDEP: a nationwide population-based cohort study. *Neurology* 2017;89:170–177.
